# Supplementary material for: KAT7/HBO1/MYST2 Regulates CENP-A Chromatin Assembly by Antagonizing Suv39h1-Mediated Centromere Inactivation
Source: PubMed Central journal article supplement (PMC4906249; doi:10.1016/j.devcel.2016.05.006), 2016-06-06
Supplement: mmc1.pdf [file mmc1.pdf]

**Developmental Cell, Volume 37**

**Supplemental Information**

**KAT7/HBO1/MYST2 Regulates CENP-A Chromatin**

**Assembly by Antagonizing Suv39h1-Mediated**

**Centromere Inactivation**

**Jun-ichirou Ohzeki, Nobuaki Shono, Koichiro Otake, Nuno M.C. Martins, Kazuto Kugou, Hiroshi Kimura, Takahiro Nagase, Vladimir Larionov, William C. Earnshaw, and Hiroshi Masumoto**

## **Supplemental Inventory**

Supplemental Figure S1, Related to Figure 1.

Supplemental Figure S2, Related to Figure 2.

Supplemental Figure S3, Related to Figure 3.

Supplemental Figure S4, Related to Figure 4.

Supplemental Figure S5, Related to Figure 5.

Supplemental Figure S6, Related to Figure 6.

Supplemental Figure S7, Related to Figure 7.

### Supplemental Figure legends

Supplemental Table S1, Related to Experimental Procedure.

Supplemental Table S2, Related to Experimental Procedure.

Supplemental Table S3, Related to Experimental Procedure.

Supplemental Table S4, Related to Experimental Procedure.

Supplemental Table S5, Related to Experimental Procedure.

### Supplemental References

**Figure S1**

**A**

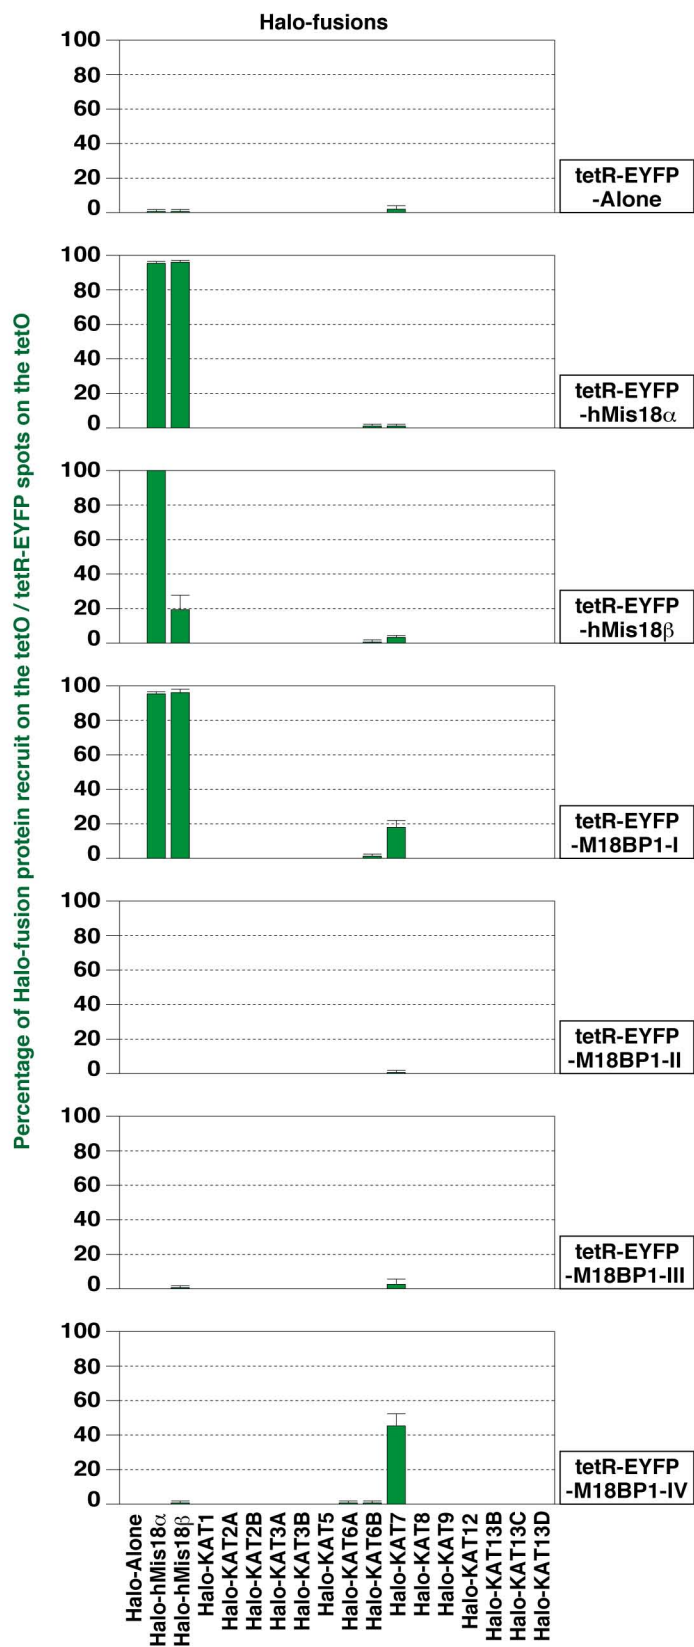

**B**

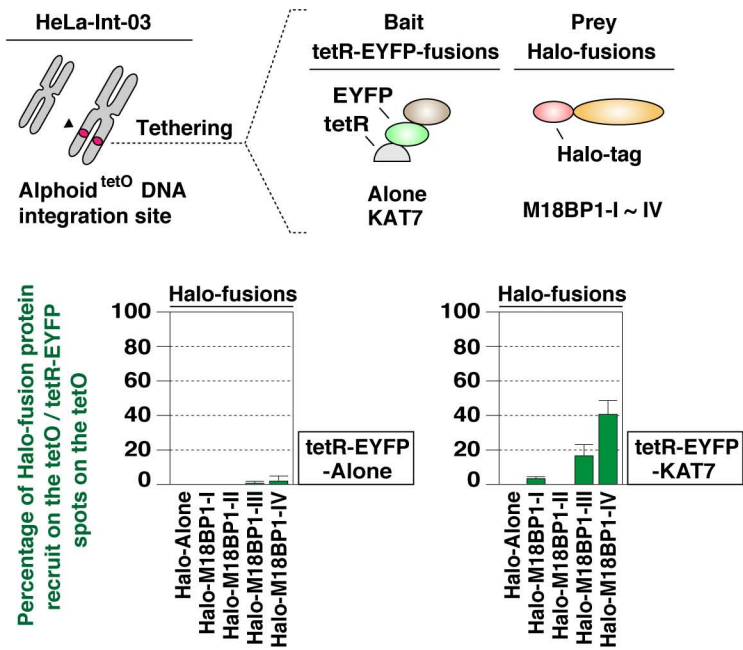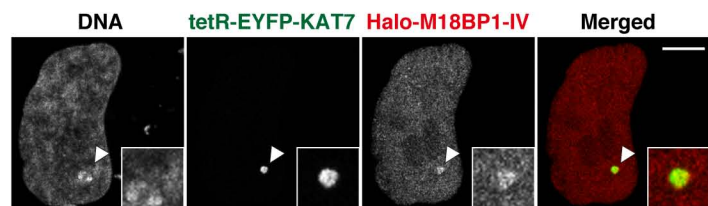

**C**

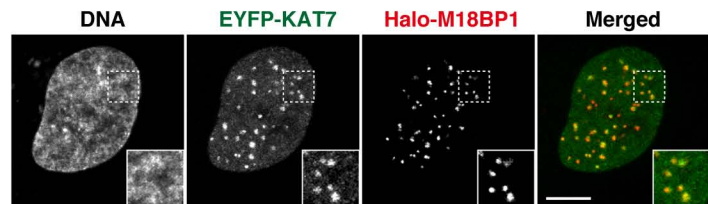

**Figure S2**

**A**

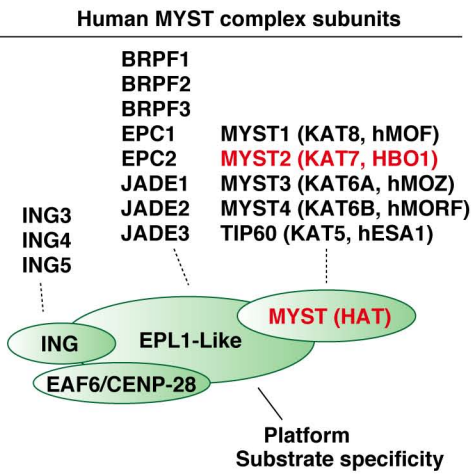

**B**

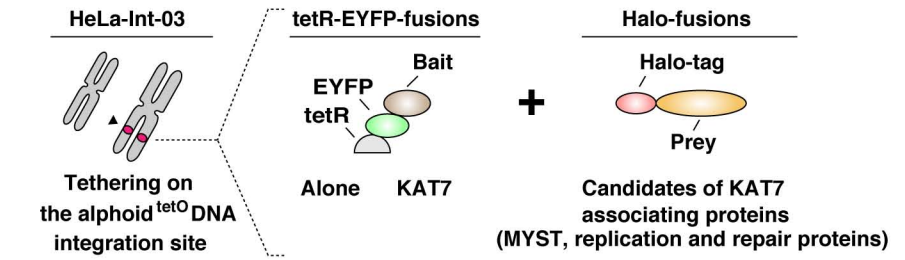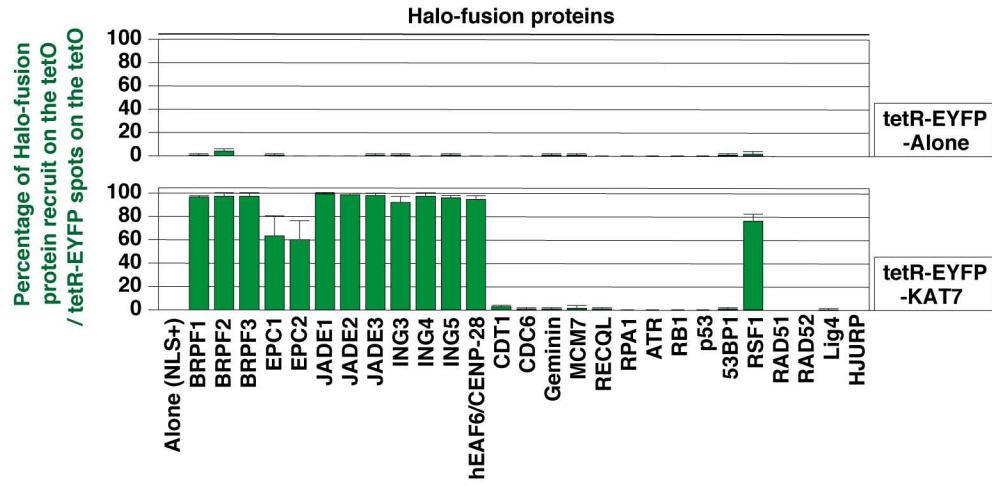

**C**

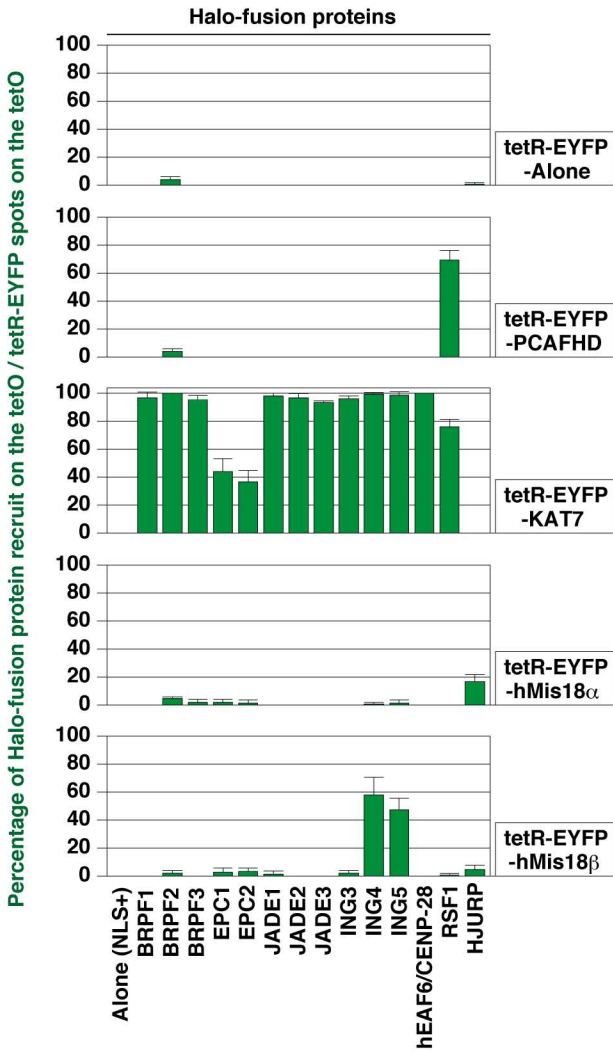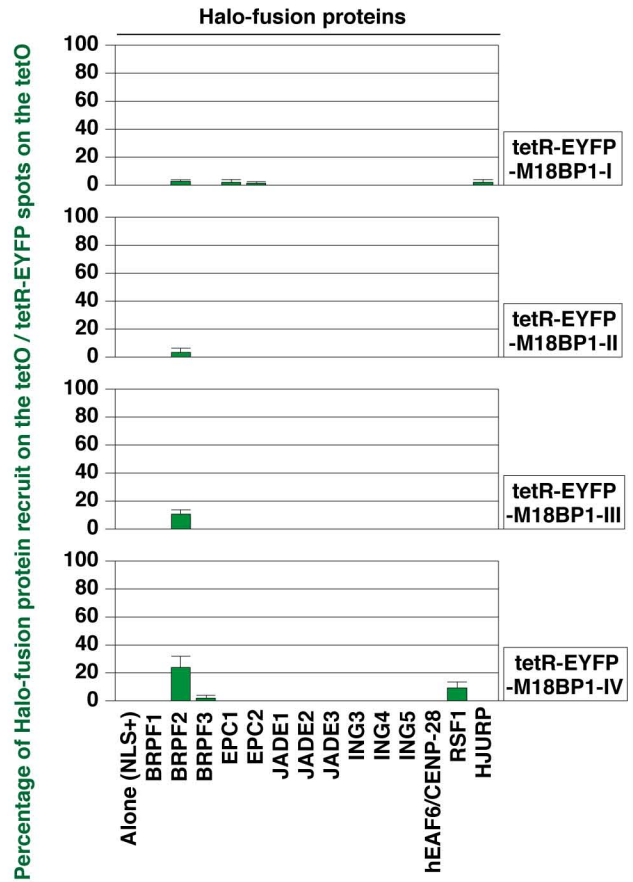

**D**

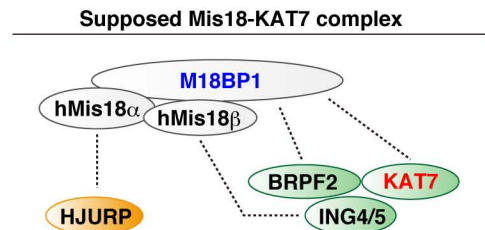

**Figure S3**

**A**

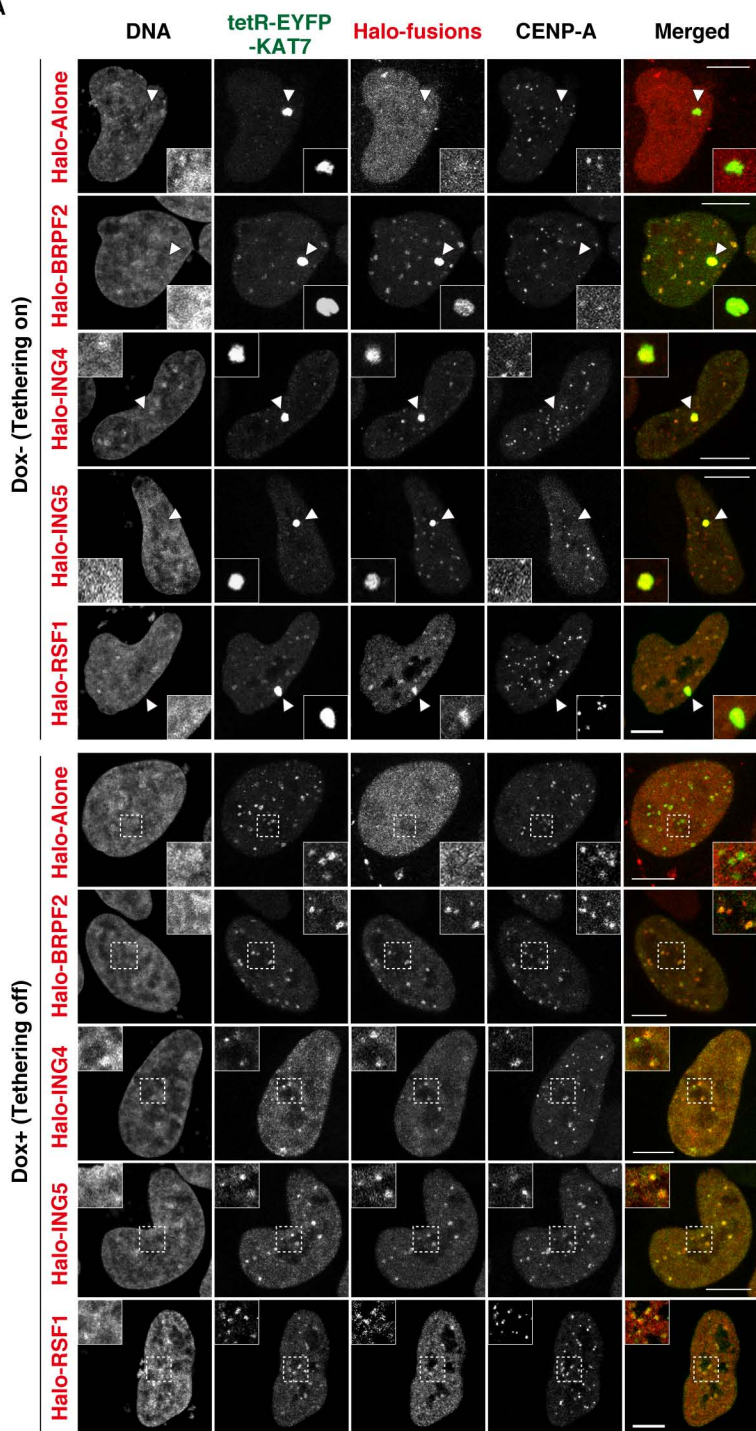

**B**

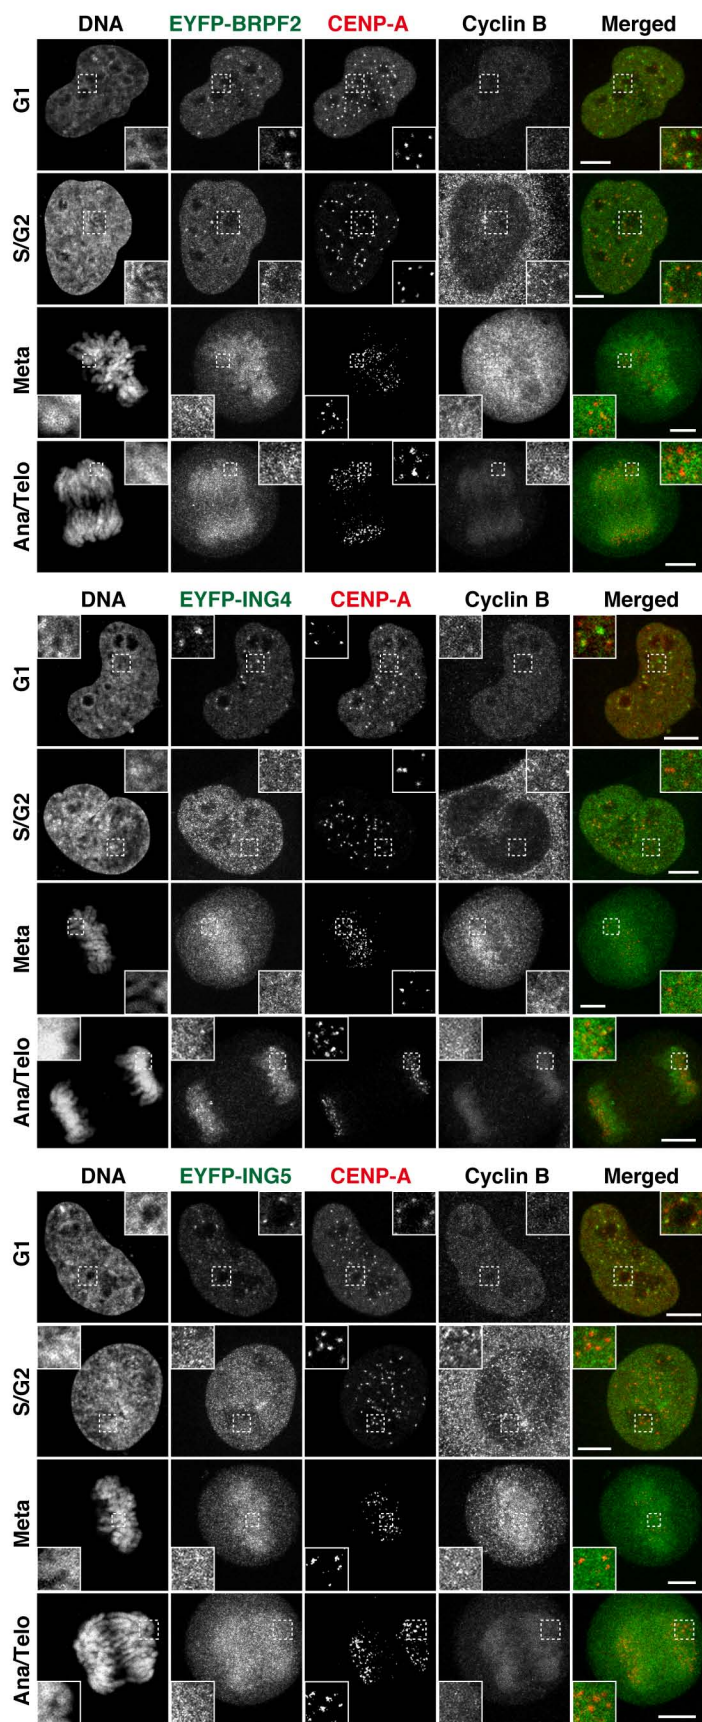

**Figure S4**

**A**

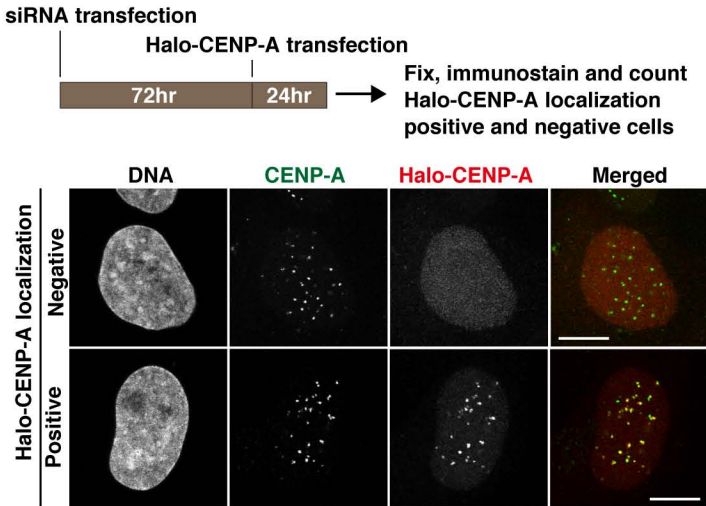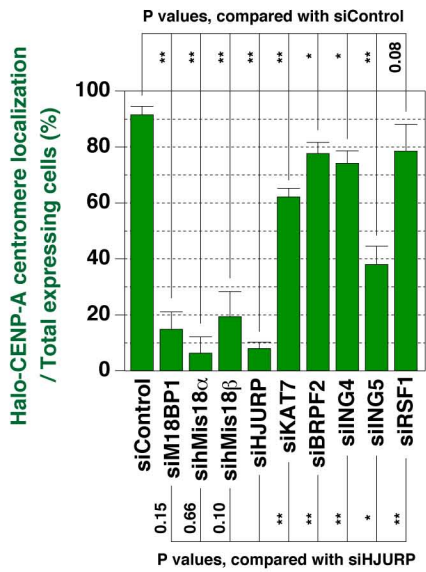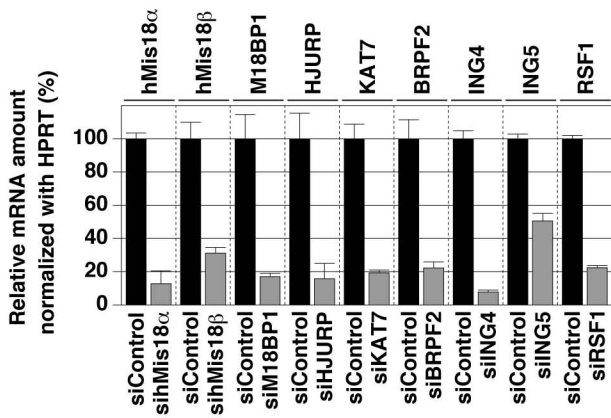

**B**

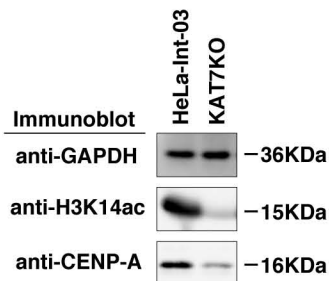

**C**

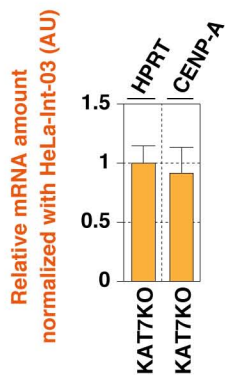

**D**

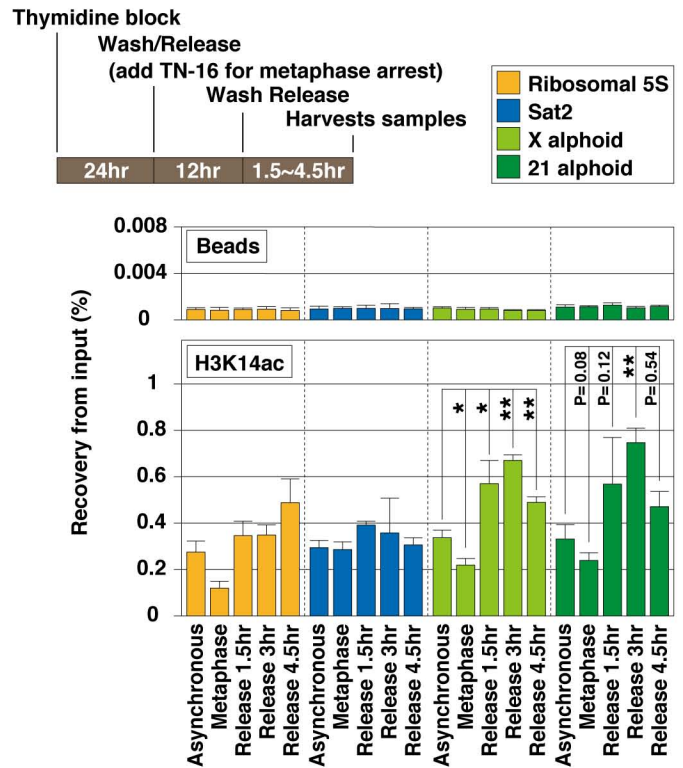

**E**

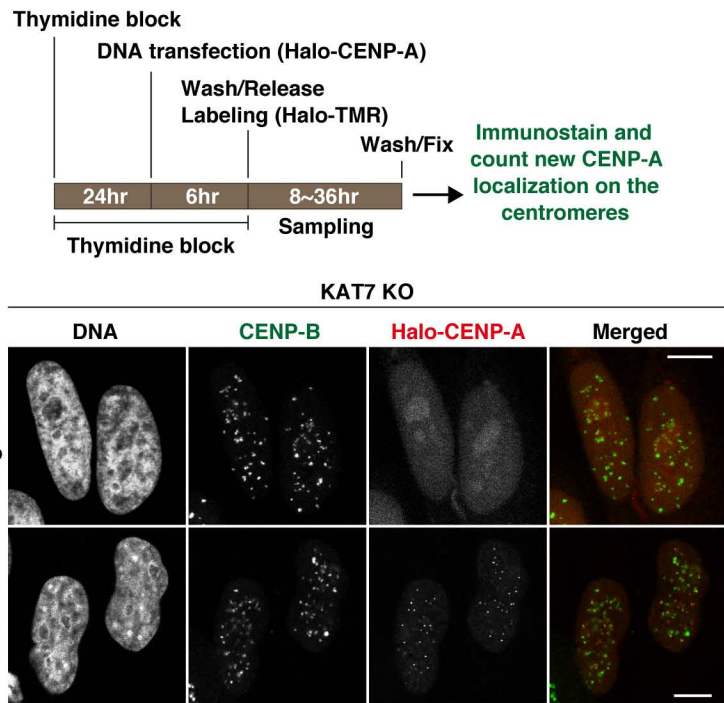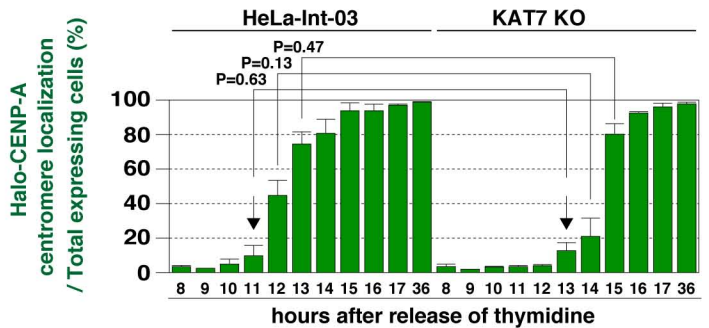

**F**

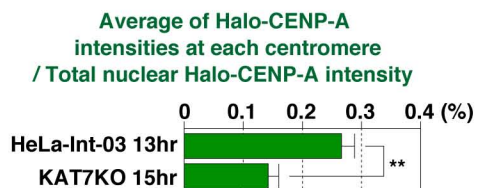

# Figure S5

A

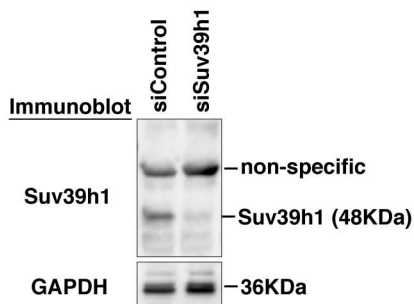

B

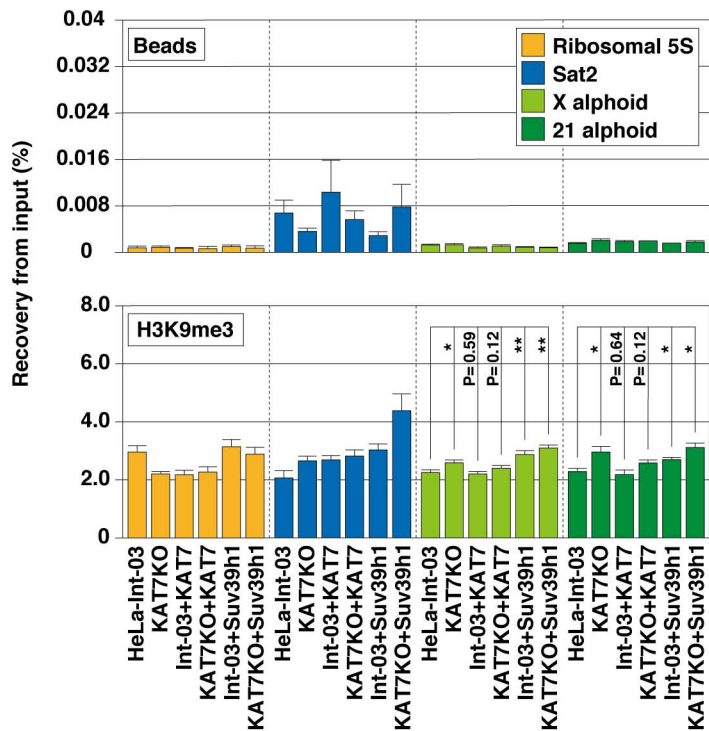

# Figure S6

A

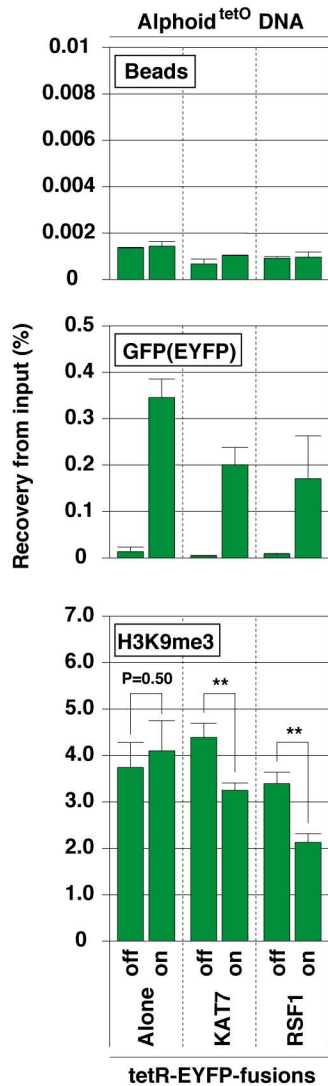

B

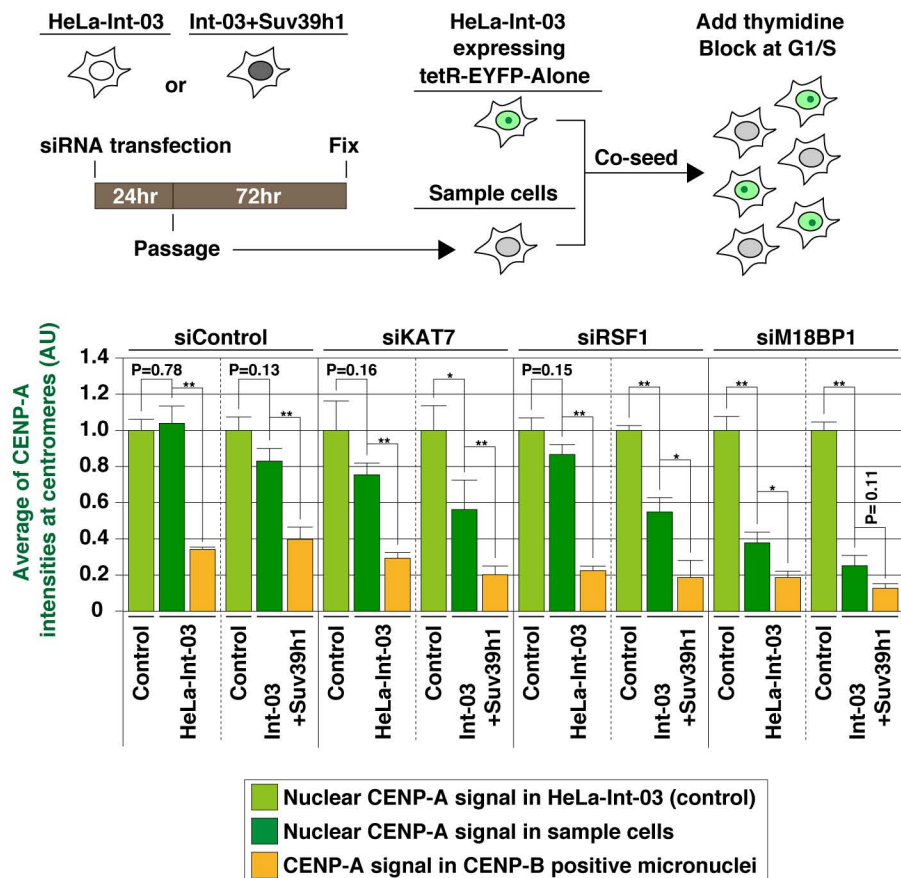



**Figure S7**

**A**

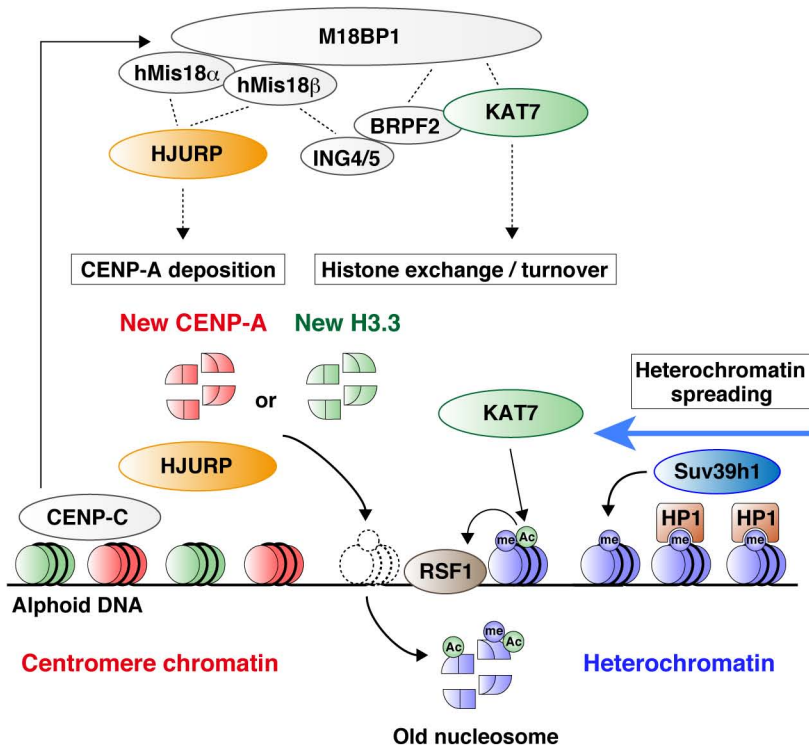

**B**

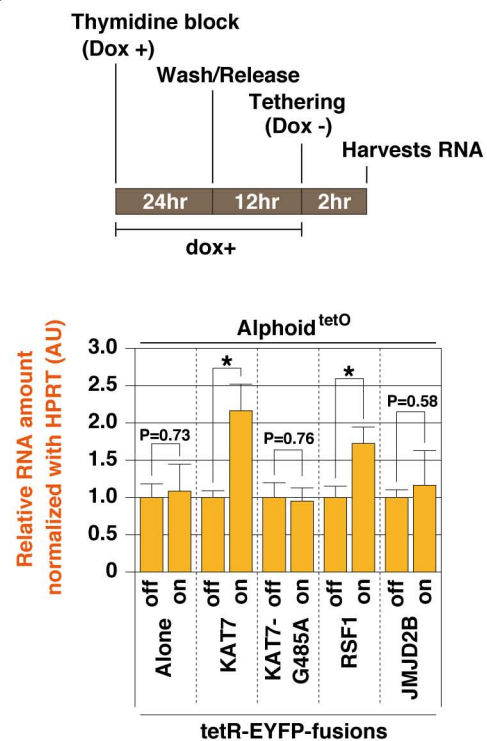

**C**

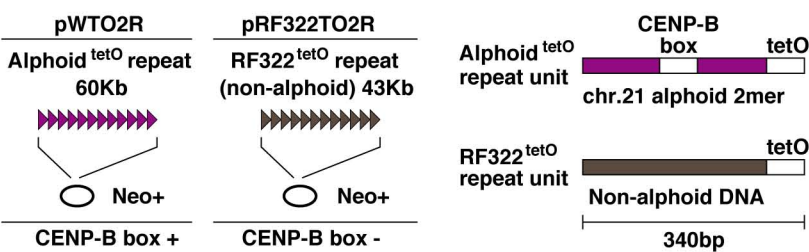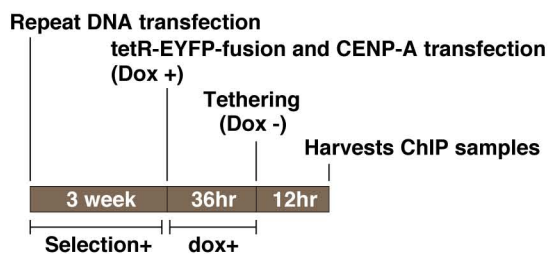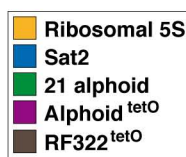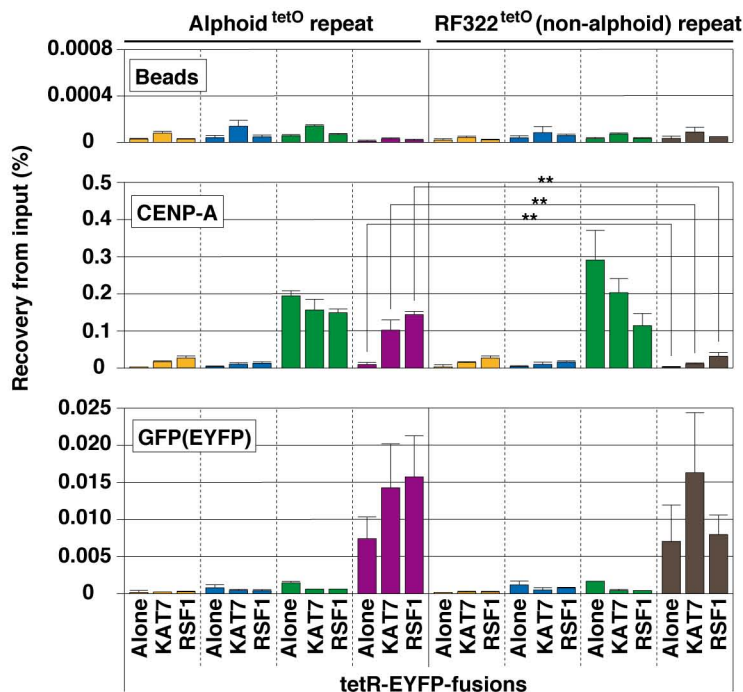

**D**

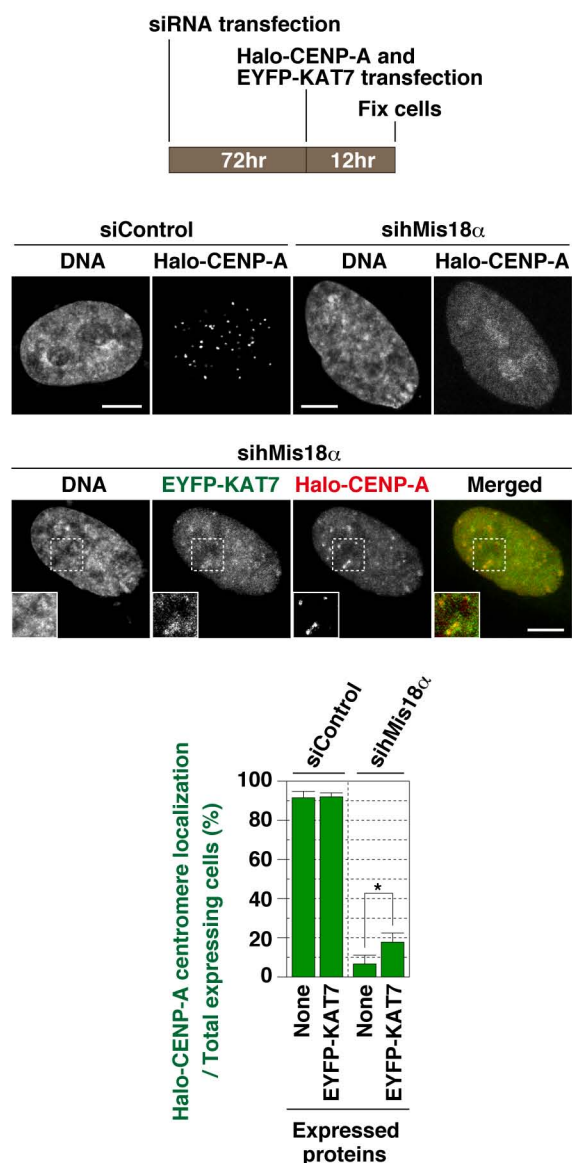

## Supplemental Figure Legends

### Figure S1. Supplemental information for Figure 1, Related to Figure 1

(A) Graphical representation of the data in Figure 1C. Data are presented as mean + s.d. (n=3). (B) M18BP1 recruitment with KAT7 tethering. (Top) Schema for the experiments. (Middle) The observed frequency of recruitment of Halo-fusion proteins by tetR-EYFP-fusion protein tethering (% of cells that have a detectable signal) was plotted (>50 tetR-EYFP spots were counted in each sample). Data are presented as mean + s.d. (n=3). (Bottom) Fluorescence images were obtained by DAPI staining (DNA), EYFP (green), and Halo-TMR-ligand (red). White arrowheads indicate the loci of tetR-EYFP-fusion protein spots on the  $\alpha$ oid<sup>tetO</sup> DNA integration site. (C) Co-localization of EYFP-KAT7 and Halo-M18BP1. Fluorescence images were obtained by DAPI staining (DNA), EYFP (green), and Halo-TMR-ligand (red). Scale bars = 5  $\mu$ m.

### Figure S2. Screening of KAT7-associating proteins, Related to Figure 2

(A) Scheme of the human MYST complexes formed on the EPL1-like motif-containing platform proteins. The MYST domain-containing HAT proteins interact with this EPL1-like motif. Inhibitor of growth (ING) subunits and EAF6/CENP-28 proteins are also components of the MYST complexes (Doyon et al., 2006; Ohta et al., 2010; Avvakumov et al., 2012). Most of the known MYST complexes are heterotetramers of the MYST domain HAT, ING subunit, EAF6/CENP-28, and EPL1-like platform proteins. In addition, KAT7 and BRPF2 heterodimer has been reported (Mishima et al., 2011). (B) Scheme of screening KAT7-associating proteins. TetR-EYFP-Alone or -KAT7 proteins were tethered to the  $\alpha$ oid<sup>tetO</sup> DNA integration site as "bait" and recruitment of Halo-tag-fused "prey" proteins tested. The Halo-fused genes were related to known

KAT7 functions, DNA replication, repair, and putative KAT7-interacting proteins. The frequency of recruitment of Halo-fusion proteins by tetR-EYFP-fusion protein tethering (% of cells that have a detectable signal) was plotted. Data are presented as mean + s.d. ( $n \geq 2$ ). (C) A graphical representation of the data in Figure 2A heat map. Data are presented as mean + s.d. ( $n \geq 2$ ). (D) A conceptual diagram of a hypothetical Mis18-KAT7 protein complex assumed from the results in Figure 2A.

### **Figure S3. Localizations of Mis18-KAT7 relating proteins, Related to Figure 3**

(A) Localizations of tetR-EYFP-KAT7 and Halo-fused proteins in the presence or absence of doxycycline. Fluorescence images were obtained with DAPI (DNA), EYFP (green) and Halo-TMR-ligand (red). White arrowheads indicate the presence of tetR-EYFP-fusion protein spots on the  $\text{alp}^{\text{tetO}}$  DNA integration site. (B) Localization of EYFP-BRPF2, -ING4 and -ING5 during the cell cycle. Fluorescence images were obtained with DAPI (DNA), EYFP (green), anti-CENP-A antibody (red), and anti-cyclin B antibody (far red: shown in gray). Cell cycles were distinguished by images of DAPI and anti-cyclin B staining. Scale bars = 5  $\mu\text{m}$ . See also Figure 3A.

### **Figure S4. Supplemental information for Figure 4, Related to Figure 4**

(A) Halo-CENP-A localization at the centromere following depletion of Mis18 and KAT7-related proteins. (Top) Scheme of the depletion experiment and examples of Halo-CENP-A localization (siING5). Fluorescence images were obtained with DAPI (DNA), anti-CENP-A antibody (green), and Halo-TMR-Ligand (red). (Middle) The centromere localization frequency of Halo-CENP-A is plotted (>200 cells were counted in each sample). Data are presented as mean + s.d. ( $n=3$ ). \* $P < 0.05$ , \*\* $P < 0.005$  (t-test). (Bottom) Relative mRNA levels. Cells were transfected with siRNA and total RNA was

purified after 3 days. The total RNA was reverse transcribed and quantitated by qPCR. Quantitated target mRNA amounts were normalized to *HPRT* mRNA and plotted. The primer sets used are indicated at the top of the graph. The transfected siRNAs are indicated at the bottom of the graph. Data are presented as mean + s.d. (n=3). (B) H3K14ac and CENP-A immunoblotting using total cell lysate. GAPDH was used as a loading control. (C) RT-PCR quantitation of mRNA levels. Data are presented as mean + s.d. (n=3). (D) Time course ChIP analysis. Cells were harvested at each time point and fixed for ChIP analysis. ChIP was carried out with anti-H3K14ac antibody or beads alone (no antibody) as a control. Data are presented as mean + s.d. (n=3). \*P<0.05, \*\*P<0.005 (t-test). (E) (Top) Scheme of detecting a new CENP-A localization at the centromere. Cells were synchronized at G1/S using thymidine and then transfected with the vector expressing Halo-CENP-A. Cells were fixed at each time point after release of the thymidine block. (Middle) Fluorescence images were obtained with DAPI (DNA), anti-CENP-B antibody (green), and Halo-TMR-ligand (red). Scale bars = 5  $\mu$ m. (Bottom) Centromere localization frequency of Halo-CENP-A (>200 cells were counted in each sample). Black arrows indicate a time point when >50% of cells exit mitosis. Data are presented as mean + s.d. (n=2). (F) Average of Halo-CENP-A intensity at each centromere. From the panel E experiments, cell samples from a time point when >50% of cells had new CENP-A localization (i.e. HeLa-Int-03 13hr and KAT7KO 15hr) were selected, and used for image quantitation. Total nuclear Halo-CENP-A intensity and centromere-localized Halo-CENP-A intensities were quantitated. The average Halo-CENP-A intensity at each centromere was normalized to the total nuclear Halo-CENP-A intensity of each cell. Data are presented as mean + s.e. (n $\geq$ 10 cells, >20 centromeres were analyzed in each cell). \*\*P<0.005 (t-test).

**Figure S5. Supplemental information for Figure 5, Related to Figure 5**

(A) Suv39h1 immunoblotting. Total cell lysates of control and Suv39h1 depleted cells were analyzed. See also Figure 5B. (B) ChIP analysis. ChIP was carried out with anti-H3K9me3 antibody or beads alone (no antibody) as a control. Data are presented as mean + s.e. ( $n \geq 3$ ). \* $P < 0.05$ , \*\* $P < 0.005$  (t-test).

**Figure S6. Supplemental information for Figure 6, Related to Figure 6**

(A) Confirmation of H3K9me3 reduction by ChIP. ChIP was carried out with anti-GFP antibody, anti-H3K9me3 antibody or beads alone (no antibody) as a control. Data are presented as mean + s.d. ( $n = 3$ ). \*\* $P < 0.005$  (t-test). (B) CENP-A intensity quantitation of siRNA transfected cells in Figure 6E. Control (HeLa-Int-03 expressing tetR-EYFP) and target cells were co-seeded on coverslips, and arrested at G1/S with thymidine. The cells were fixed, stained with CENP-A and CENP-B antibody and then used for microscopy. The CENP-A signal at centromeres including CENP-B positive micronuclei was quantitated and plotted in the right panel. Data are presented as mean + s.e. ( $n \geq 5$  micronuclei). \* $P < 0.05$ , \*\* $P < 0.005$  (t-test). See also Figure 6E.

**Figure S7. A models and Supplemental information about KAT7 functions, Related to Figure 7**

(A) Models of KAT7 function. KAT7 acetylates not only histone H3 but also H4 (Miotto et al., 2010). CENP-C interacts with HJURP, and may have an additional essential role not shared by the Mis18-KAT7 complex in the *de novo* endogenous CENP-A assembly pathway (Zasadzińska et al., 2013; Müller et al., 2014; Tachiwana et al., 2015; Shono et al., 2015). See also the Discussion. (B) Quantitation of alphoid<sup>tetO</sup> RNA levels. (Top) Schema of time course. TetR-EYFP-fusion protein-expressing cells were synchronized

at G1/S with thymidine. Cells were then released and cultured for 12 hour (at this time point, most of cells were in G1 phase) in the presence of doxycycline. Doxycycline was washed out 2 hour before RNA harvesting. The amount of RNA was quantified by quantitative RT-PCR. (Bottom) Alphoid<sup>tetO</sup> RNA levels were normalized with *HPRT* and plotted in the graph. Data are presented as mean + s.d. (n=3). \*P<0.05 (t-test). (C) CHIP analysis combined with transient transfection using a non-alphoid DNA sequence. (Top) Plasmids used for this study. Plasmid pWTO2R contains 60kb of alphoid<sup>tetO</sup> repeat DNA insert (Ohzeki et al., 2012). Plasmid pRF322TO2R contains a synthetic repeat of pBR322 restriction fragment (Ohzeki et al., 2002) combined with the tetO site. These plasmids contain a Neomycin resistant gene cassette. Plasmid pWTO2R or pRF322TO2R, was respectively transfected into HeLa cells and selected with Geneticin (selective drug for Neomycin) for 3 weeks. Next, vectors expressing tetR-EYFP-fusion proteins and Halo-CENP-A were transfected to the cells. After 12 hours of tethering, cells were harvested for CHIP. (Bottom) CHIP analysis. CHIP was carried out with anti-CENP-A antibody, anti-GFP antibody or beads alone (no antibody) as a control. Data are presented as mean + s.d. (n=3). \*\*P<0.005 (t-test). (D) KAT7 overproduction bypasses the absence of hMis18 $\alpha$ . (Top) Scheme for hMis18 $\alpha$  depletion and KAT7 overproduction. (Middle) Examples of staining. Fluorescence images were obtained by DAPI staining (DNA), EYFP (green), and Halo-TMR-ligand (red). Scale bars = 5  $\mu$ m. (Bottom) Data are presented as mean + s.d. (n=3, >200 cells were counted in each sample). \*P<0.05 (t-test).

Table S1. siRNAs Used in this Study, Related to Experimental Procedure

| Target gene          | Sequence                     | Reference             |
|----------------------|------------------------------|-----------------------|
| Control (siNegative) | No information               | Ambion, AM4611        |
| hMis18 $\alpha$      | 5'-CAGAAGCUAUCCAAACGUGTT-3'  | Fujita et al., 2007   |
| hMis18 $\beta$       | 5'-CAAUCGCUUAAAUCACUAtt-3'   | Ambion, s22367        |
| M18BP1               | 5'-GAAGUCUGGUGUUAGGAAATT-3'  | Fujita et al., 2007   |
| HJURP                | 5'-CUACUGGGCUC AACUGCAAUU-3' | Dunleavy et al., 2009 |
| KAT7                 | 5'-GGAUGCCCACUGUAUCAUAtt-3'  | Ambion, s253          |
| BRPF2                | 5'-GAAACUAUAGACAAGUUAAtt-3'  | Ambion, s24388        |
| ING4                 | 5'-UGCUCGUGCUCGUUCCAAAtt-3'  | Ambion, s27553        |
| ING5                 | 5'-CCUUACCACGAAACCCAAAtt-3'  | Ambion, s38829        |
| RSF1                 | 5'-GGAUAUCAAGUCGGAAAAAtt-3'  | Ambion, s28648        |
| Suv39h1              | 5'-AGAACAGCUUCGUCAUGGAtt-3'  | Ambion, s13658        |

Table S2. Plasmid Vectors Used in this Study, Related to Experimental Procedure

| Name                      | Backbone  | Cloned genes              | Reference                 |
|---------------------------|-----------|---------------------------|---------------------------|
| pJETy3                    |           | tetR-EYFP-alone           | Ohzeki et al., 2012       |
| pJETy3-hMis18 $\alpha$    | pJETy3    | tetR-EYFP-hMis18 $\alpha$ | Ohzeki et al., 2012       |
| pJETy3-hMis18 $\beta$     | pJETy3    | tetR-EYFP-hMis18 $\beta$  | This study                |
| pJETy3-M18BP1-I           | pJETy3    | tetR-EYFP-M18BP1-I        | This study                |
| pJETy3-M18BP1-II          | pJETy3    | tetR-EYFP-M18BP1-II       | This study                |
| pJETy3-M18BP1-III         | pJETy3    | tetR-EYFP-M18BP1-III      | This study                |
| pJETy3-M18BP1-IV          | pJETy3    | tetR-EYFP-M18BP1-IV       | This study                |
| pJETy3-KAT7               | pJETy3    | tetR-EYFP-KAT7            | This study                |
| pJETy3-KAT7 G485A         | pJETy3    | tetR-EYFP-KAT7 G485A      | This study                |
| pJETy3-PCAFHD             | pJETy3    | tetR-EYFP-PCAFHD          | Ohzeki et al., 2012       |
| pJETy3-BRPF2              | pJETy3    | tetR-EYFP-BRPF2           | This study                |
| pJETy3-ING4               | pJETy3    | tetR-EYFP-ING4            | This study                |
| pJETy3-ING5               | pJETy3    | tetR-EYFP-ING5            | This study                |
| pJETy3-RSF1               | pJETy3    | tetR-EYFP-RSF1            | This study                |
| pJETy3-JMJD2B             | pJETy3    | tetR-EYFP-JMJD2B          | This study                |
| pJETB3                    |           | tetR-BFP-alone            | This study                |
| pJETB3-hMis18 $\alpha$    | pJETB3    | tetR-BFP-hMis18 $\alpha$  | This study                |
| pJETB3-hMis18 $\beta$     | pJETB3    | tetR-BFP-hMis18 $\beta$   | This study                |
| pJ3-EYFP                  |           | EYFP                      | This study                |
| pJ3-EYFP-KAT7             | pJ3-EYFP  | EYFP-KAT7                 | This study                |
| pJ3-EYFP-BRPF2            | pJ3-EYFP  | EYFP-BRPF2                | This study                |
| pJ3-EYFP-ING4             | pJ3-EYFP  | EYFP-ING4                 | This study                |
| pJ3-EYFP-ING5             | pJ3-EYFP  | EYFP-ING5                 | This study                |
| pJ4IB-3HA-M18BP1-I        | pJ4IB-3HA | 3xHA-M18BP1-I             | This study                |
| pJ4IB-3HA-M18BP1-IV       | pJ4IB-3HA | 3xHA-M18BP1-IV            | This study                |
| pJ4IB-3HA-hMis18 $\beta$  | pJ4IB-3HA | 3xHA-hMis18 $\beta$       | This study                |
| pJ4IB-3HA-ING4            | pJ4IB-3HA | 3xHA-ING4                 | This study                |
| pJ4IB-3FL-KAT7            | pJ4IB-3FL | 3xFLAG-KAT7               | This study                |
| pJ4IB-3FL-hMis18 $\alpha$ | pJ4IB-3FL | 3xFLAG-hMis18 $\alpha$    | This study                |
| pJ4IB-3FL-ING5            | pJ4IB-3FL | 3xFLAG-ING5               | This study                |
| pJ4-Halo7                 |           | Halo-tag                  |                           |
| pJ4IB-Halo7-Suv39h1       | pJ4-Halo7 | Halo-Suv39h1              | This study                |
| pJ4IB-Halo7-M18BP1-I      | pJ4-Halo7 | Halo-M18BP1-I             | This study                |
| pJ4IB-Halo7-M18BP1-II     | pJ4-Halo7 | Halo-M18BP1-II            | This study                |
| pJ4IB-Halo7-M18BP1-III    | pJ4-Halo7 | Halo-M18BP1-III           | This study                |
| pJ4IB-Halo7-M18BP1-IV     | pJ4-Halo7 | Halo-M18BP1-IV            | This study                |
| pJTI PhiC31 Int           |           | PhiC31 integrase          | Life Technologies, A10894 |
| pX260                     |           | Cas9, gRNA                | Cong et al., 2013         |
| pJ4IB-Cas9                |           | Cas9                      | This study                |
| pU6CR-KAT7                |           | gRNA for KAT7 KO          | This study                |
| pWTO2R                    | pBAC108L  | tetO aliphoid DNA         | Ohzeki et al., 2012       |
| pRF322TO2R                | pBAC108L  | synthetic repeat DNA      | This study                |

| Name                        | Backbone | Cloned genes         | Reference      |
|-----------------------------|----------|----------------------|----------------|
| pFN21A                      |          | Halo-tag             | Promega, G2821 |
| pFN21A-Halo-NLS             | pFN21A   | Halo-NLS             | This study     |
| pFN21A-Halo-hMis18 $\alpha$ | pFN21A   | Halo-hMis18 $\alpha$ | FHC27152       |
| pFN21A-Halo-hMis18 $\beta$  | pFN21A   | Halo-hMis18 $\beta$  | FHC25353       |
| pFN21A-Halo-M18BP1          | pFN21A   | Halo-M18BP1          | FHC11044       |
| pFN21A-Halo-KAT1            | pFN21A   | Halo-KAT1            | FHC21224       |
| pFN21A-Halo-KAT2A           | pFN21A   | Halo-KAT2A           | FHC03762       |
| pFN21A-Halo-KAT2B           | pFN21A   | Halo-KAT2B           | FHC11610       |
| pFN21A-Halo-KAT3A           | pFN21A   | Halo-KAT3A           | FHC11778       |
| pFN21A-Halo-KAT3B           | pFN21A   | Halo-KAT3B           | FHC01787       |
| pFN21A-Halo-KAT5            | pFN21A   | Halo-KAT5            | FHC02643       |
| pFN21A-Halo-KAT6A           | pFN21A   | Halo-KAT6A           | FHC03163       |
| pFN21A-Halo-KAT6B           | pFN21A   | Halo-KAT6B           | FHC005623      |
| pFN21A-Halo-KAT7            | pFN21A   | Halo-KAT7            | FHC06090       |
| pFN21A-Halo-KAT8            | pFN21A   | Halo-KAT8            | FHC02573       |
| pFN21A-Halo-KAT9            | pFN21A   | Halo-KAT9            | FHC02650       |
| pFN21A-Halo-KAT12           | pFN21A   | Halo-KAT12           | FHC11853       |
| pFN21A-Halo-KAT13B          | pFN21A   | Halo-KAT13B          | FHC01529       |
| pFN21A-Halo-KAT13C          | pFN21A   | Halo-KAT13C          | FHC01199       |
| pFN21A-Halo-KAT13D          | pFN21A   | Halo-KAT13D          | FHC00509       |
| pFN21A-Halo-Suv39h1         | pFN21A   | Halo-Suv39h1         | FHC09879       |
| pFN21A-Halo-BRPF1           | pFN21A   | Halo-BRPF1           | FHC01228       |
| pFN21A-Halo-BRPF2           | pFN21A   | Halo-BRPF2           | FHC02120       |
| pFN21A-Halo-BRPF3           | pFN21A   | Halo-BRPF3           | FHC01683       |
| pFN21A-Halo-EPC1            | pFN21A   | Halo-EPC1            | FHC11123       |
| pFN21A-Halo-EPC2            | pFN21A   | Halo-EPC2            | FHC30908       |
| pFN21A-Halo-JADE1           | pFN21A   | Halo-JADE1           | FHC09414       |
| pFN21A-Halo-JADE2           | pFN21A   | Halo-JADE2           | FHC00474       |
| pFN21A-Halo-JADE3           | pFN21A   | Halo-JADE3           | FHC00463       |
| pFN21A-Halo-ING3            | pFN21A   | Halo-ING3            | FHC02414       |
| pFN21A-Halo-ING4            | pFN21A   | Halo-ING4            | FHC02495       |
| pFN21A-Halo-ING5            | pFN21A   | Halo-ING5            | FHC03674       |
| pFN21A-Halo-CENP-28         | pFN21A   | Halo-CENP-28         | FHC04343       |
| pFN21A-Halo-RSF1            | pFN21A   | Halo-RSF1            | FHC11761       |
| pFN21A-Halo-HJURP           | pFN21A   | Halo-HJURP           | FHC28790       |
| pFN21A-Halo-CENP-A          | pFN21A   | Halo-CENP-A          | FHC20935       |
| pFN21A-Halo-hisone H3.3     | pFN21A   | Halo-hisone H3.3     | This study     |
| pFN21A-Halo-CDT1            | pFN21A   | Halo-CDT1            | This study     |
| pFN21A-Halo-CDC6            | pFN21A   | Halo-CDC6            | FHC10183       |
| pFN21A-Halo-Geminin         | pFN21A   | Halo-Geminin         | FHC10644       |
| pFN21A-Halo-MCM7            | pFN21A   | Halo-MCM7            | FHC05950       |
| pFN21A-Halo-RPA1            | pFN21A   | Halo-RPA1            | FHC01462       |
| pFN21A-Halo-ATR             | pFN21A   | Halo-ATR             | FHC11858       |
| pFN21A-Halo-RB1             | pFN21A   | Halo-RB1             | FHC01227       |
| pFN21A-Halo-p53             | pFN21A   | Halo-p53             | FHC10374       |
| pFN21A-Halo-53BP1           | pFN21A   | Halo-53BP1           | FHC00998       |
| pFN21A-Halo-RAD51           | pFN21A   | Halo-RAD51           | FHC10574       |
| pFN21A-Halo-RAD52           | pFN21A   | Halo-RAD52           | FHC10450       |
| pFN21A-Halo-Lig4            | pFN21A   | Halo-Lig4            | FHC10347       |

Note; Halo-tag fused genes are available at Kazusa DNA Research Institute Human cDNA/ORF Clone distribution (<http://www.kazusa.or.jp/kop/dsearch-e/>).



Table S3. Cell Lines Used in this Study, Related to Experimental Procedure

| Name            | Host cell | Transfected alphoid DNA                        | Event       | Modified genes | Expressing genes | Reference           |
|-----------------|-----------|------------------------------------------------|-------------|----------------|------------------|---------------------|
| HeLa-Int-03     | HeLa      | pWTO2R (Chr. 21-based tetO-Alphoid DNA repeat) | Integration | None           | None             | Ohzeki et al., 2012 |
| Int-03+KAT7     | HeLa      | pWTO2R                                         | Integration | None           | EYFP-KAT7        | This study          |
| Int-03+Suv39h1  | HeLa      | pWTO2R                                         | Integration | None           | Halo-Suv39h1     | This study          |
| Int-03+tR-alone | HeLa      | pWTO2R                                         | Integration | None           | tetR-EYFP-alone  | This study          |
| KAT7KO          | HeLa      | pWTO2R                                         | Integration | KAT7 knockout  | None             | This study          |
| KAT7KO+KAT7     | HeLa      | pWTO2R                                         | Integration | KAT7 knockout  | EYFP-KAT7        | This study          |
| KAT7KO+Suv39h1  | HeLa      | pWTO2R                                         | Integration | KAT7 knockout  | Halo-Suv39h1     | This study          |

Table S4. Antibodies Used in this Study, Related to Experimental Procedure

| Antibodies          | Catalog number    | Antibody produced in | Usage                         | Reference                 |
|---------------------|-------------------|----------------------|-------------------------------|---------------------------|
| anti-CENP-A (A1)    | None              | Mouse                | Immunostain, Immunoblot, ChIP | Ohzeki et al., 2002       |
| anti-CENP-A (6F2)   | None              | Rat                  | Immunostain                   | Kind gift from Kinya Yoda |
| anti-CENP-B (5E6C1) | None              | Mouse                | Immunostain                   | Ohzeki et al., 2002       |
| anti-KAT7           | abcam, ab70183    | Rabbit               | Immunostain, Immunoblot, IP   |                           |
| anti-Suv39h1        | SIGMA, S8316      | Mouse                | Immunoblot                    |                           |
| anti-M18BP1         | NOVUS, NBP1-47290 | Rabbit               | Immunoblot, IP                |                           |
| anti-HJURP (27D1)   | None              | Mouse                | Immunoblot                    | This study                |
| anti-RSF1 (EPR3749) | GeneTex, GTX62703 | Rabbit               | Immunoblot                    |                           |
| anti-H3K14ac (7G8)  | None              | Mouse                | Immunostain, Immunoblot, ChIP | This study                |
| anti-H3K9me3        | WAKO, MABI 0308   | Mouse                | ChIP                          |                           |
| anti-H3K9me3        | abcam, ab8898     | Rabbit               | Immunostain                   |                           |
| anti-Cyclin B       | SIGMA, C-8831     | Rabbit               | Immunostain                   |                           |
| anti-GFP            | MBL, 598          | Rabbit               | Immunoblot                    |                           |
| anti-Halo-tag       | Promega, G928A    | Rabbit               | Immunoblot                    |                           |
| anti-HA-7           | SIGMA, H3663      | Mouse                | Immunoblot                    |                           |
| anti-FLAGM2         | SIGMA, F3165      | Mouse                | Immunoblot                    |                           |
| anti-tubulin        | abcam, ab6160     | Rat                  | Immunostain                   |                           |

Table S5. Primer DNA Sequences Used for Quantitative PCR, Related to Experimental Procedure

| Name                     | primer 1 (5' to 3')           | primer 2 (5' to 3')           | Reference           |
|--------------------------|-------------------------------|-------------------------------|---------------------|
| 5S Ribosomal DNA         | ACGCTGGGTTCCCTGCCGTT          | TGGCTGGCGTCTGTGGCACCCGCT      | Ohzeki et al., 2012 |
| Satellite 2              | TCGCATAGAATCGAATGGAA          | GCA TTCGAGTCCGTGGA            | Ohzeki et al., 2012 |
| X alphoid                | AGA TTTGGACCGCTTTGAGGC        | CCGTTTCAAGTTATGGGAAGTTGA      | Ohzeki et al., 2012 |
| 21-l alphoid             | CTAGACAGAAGCCCTCTCAG          | GGGAAGACA TTCCCTTTTTTCACC     | Ohzeki et al., 2012 |
| tetO alphoid             | GTGGAATCTGCAAGTGGATATTTGAC    | CTGATAGGGAGAGCTCTGCTGCTAG     | Ohzeki et al., 2012 |
| RF322T(synthetic repeat) | TGGCCGGCATCACCGGCGCCAGAGGTC   | TGATATCGCCCAACAGTCCCCCGGCCA   | This study          |
| HPRT mRNA                | GGACCCACGAAGTGTTGG            | CTGGCGATGTCAATAGGACTCCAG      | Ohzeki et al., 2012 |
| CENP-A mRNA              | AAAGCTTCAGAAGAGCACACACCTCTTG  | CATGTAAGGTGAGGAGATAGGCGTCCTC  | This study          |
| hMis18 $\alpha$ mRNA     | CATCCTGCTTCGCTGTGTTTCCTG      | TTGAGTGAGCACCCCGCGCAGCAC      | Ohzeki et al., 2012 |
| hMis18 $\beta$ mRNA      | GGTGCACCTCGCCTGGGACCTGTCGCGG  | AACTAGGAAGGGCGCTTCCAAAACGACG  | This study          |
| M18BP1 mRNA              | ACTAAGAGCCTCAGTCCAAGGAGTTCCTC | GGCACTGAATCTTTTGTTTGACCGGGAGG | This study          |
| HJURP mRNA               | GCCATCATCACCCCTGGGGTGCAG      | GCAACACATGTAGATGAAGGAGCCTC    | Ohzeki et al., 2012 |
| KAT7 mRNA                | TCTCCGCTACCTGCATAATTTCAAGGC   | TTGGAGTTGGACCTTTTGGCCTCTTTGG  | This study          |
| BRPF2 mRNA               | CAGTCTCAGCGAAGCTCACAGCAGAGAG  | CCGCAGCTCCATGGCGACCTGCTCCACC  | This study          |
| ING4 mRNA                | AACTTTCAGCTCATGAGGGACCTAGACC  | TTTTCTCGGAGCTCAGGCTGCGGGCAC   | This study          |
| ING5 mRNA                | AACTTCCAGCTGATGCGAGAGCTGGACC  | TGGAGACAGCGTCTTCACCGTGGAGATG  | This study          |
| RSF1 mRNA                | CTGCAGACAGATGGGAAAAATATTTGATC | GACACTCACAGAGGTACTTTAAGAGTGC  | This study          |

### **Supplemental references**

Avvakumov, N., Lalonde, M.E., Saksouk, N., Paquet, E., Glass, K.C., Landry, A.J., Doyon, Y., Cayrou, C., Robitaille, G.A., Richard, D.E., et al. (2012). Conserved molecular interactions within the HBO1 acetyltransferase complexes regulate cell proliferation. *Mol Cell Biol.* *32*, 689-703.

Mishima, Y., Miyagi, S., Saraya, A., Negishi, M., Endoh, M., Endo, T.A., Toyoda, T., Shinga, J., Katsumoto, T., Chiba, T., et al. (2011). The Hbo1-Brd1/Brpf2 complex is responsible for global acetylation of H3K14 and required for fetal liver erythropoiesis. *Blood.* *118*, 2443-53.

Müller, S., Montes, de Oca, R., Lacoste, N., Dingli, F., Loew, D., Almouzni, G. (2014). Phosphorylation and DNA binding of HJURP determine its centromeric recruitment and function in CenH3(CENP-A) loading. *Cell Rep.* *8*, 190-203.

Ohta, S., Bukowski-Wills, J.C., Sanchez-Pulido, L., Alves. Fde. L., Wood, L., Chen, Z.A., Platani, M., Fischer, L., Hudson, D.F., Ponting, C.P., et al. (2010). The protein composition of mitotic chromosomes determined using multiclassifier combinatorial proteomics. *Cell.* *142*, 810-21.

Tachiwana, H., Müller, S., Blümer, J., Klare, K., Musacchio, A., Almouzni, G. (2015). HJURP involvement in de novo CenH3(CENP-A) and CENP-C recruitment. *Cell Rep.* *11*, 22-32.

Zasadzińska, E., Barnhart-Dailey, M.C., Kuich, P.H., Foltz, D.R. (2013). Dimerization of the CENP-A assembly factor HJURP is required for centromeric nucleosome deposition. *EMBO J.* *32*, 2113-24.
